# Supplementary material for: Trajectories of Controller Therapy Use Before and After Asthma-Related Hospitalization in Children and Adults: Population-Based Retrospective Cohort Study
Source: PubMed Central journal article supplement (PMC10565628; doi:10.2196/50085), 2023-09-26

**Multimedia Appendix 1. Study design.**

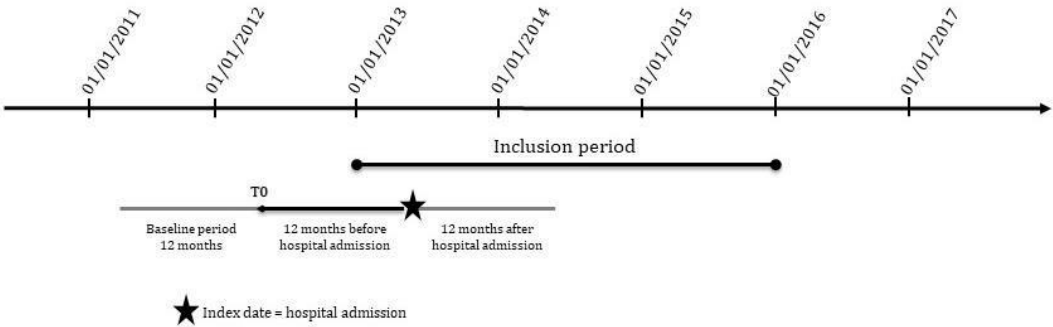

Supplement: publichealth_v9i1e50085_app1.pdf [file publichealth_v9i1e50085_app1.pdf]
