# Supplementary material for: Trajectories of Controller Therapy Use Before and After Asthma-Related Hospitalization in Children and Adults: Population-Based Retrospective Cohort Study
Source: PubMed Central journal article supplement (PMC10565628; doi:10.2196/50085), 2023-09-26
Supplement: publichealth_v9i1e50085_app3.pdf [file publichealth_v9i1e50085_app3.pdf]

**Multimedia Appendix 3.** Use of inhaled corticosteroid trajectories before and after asthma-related hospitalization by group before asthma-related hospitalization among teens/adults (n=416).

Group before hospitalisation: no use

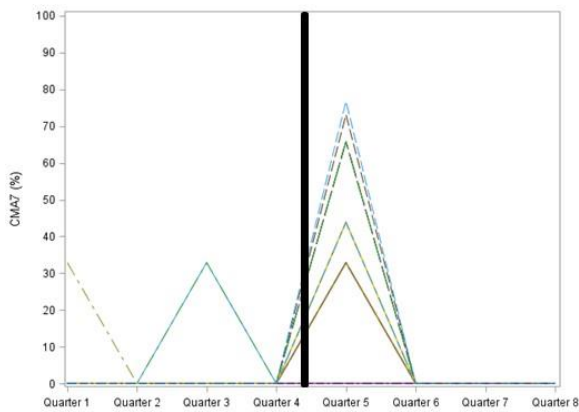

From no use to mild use

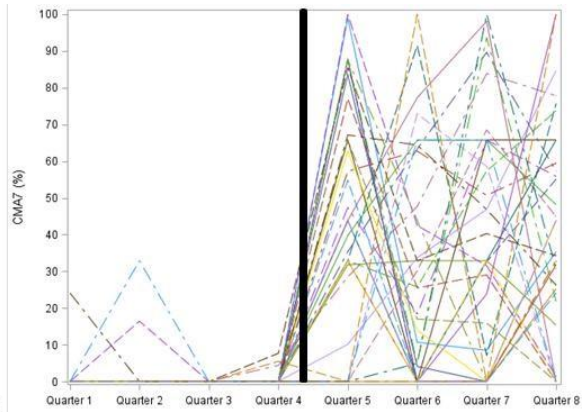

From no use to moderate use

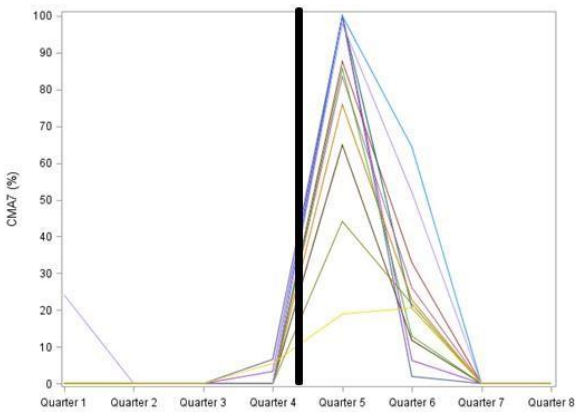

From no use to decreasing use

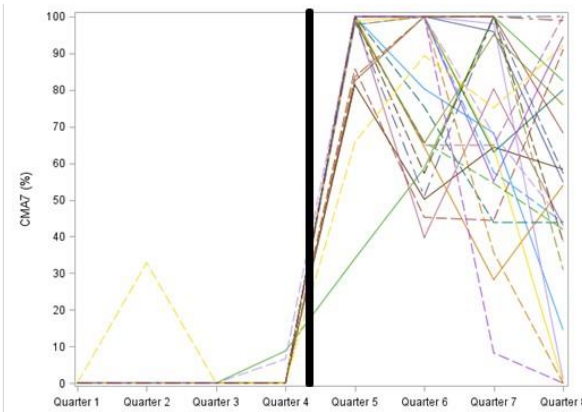

From no use to high use

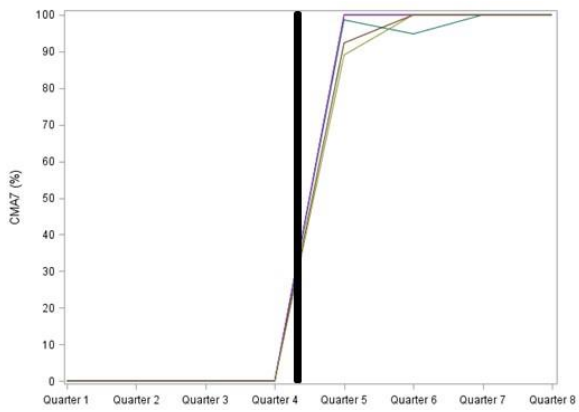

From no use to very high use

Group before hospitalisation: increasing use

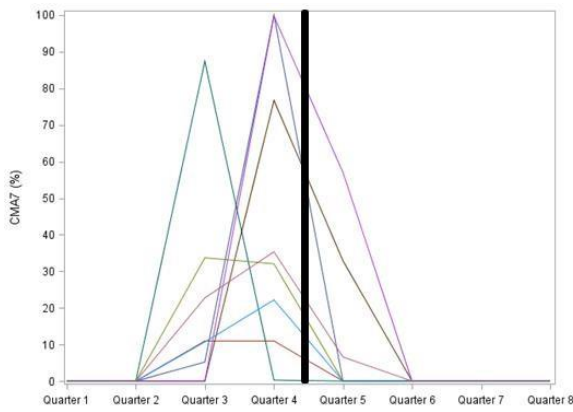

From increasing use to mild use

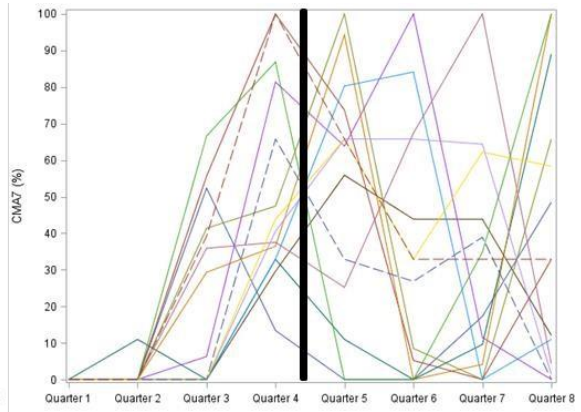

From increasing use to moderate use

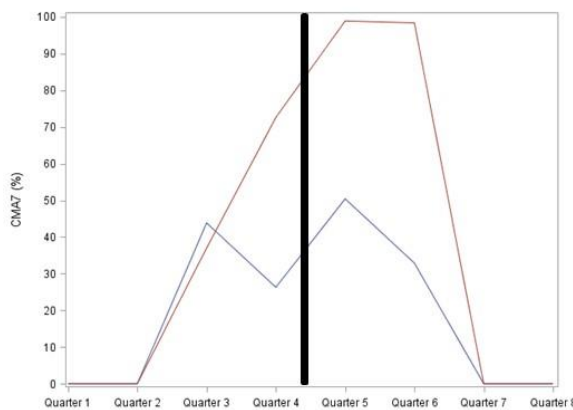

From increasing use to decreasing use

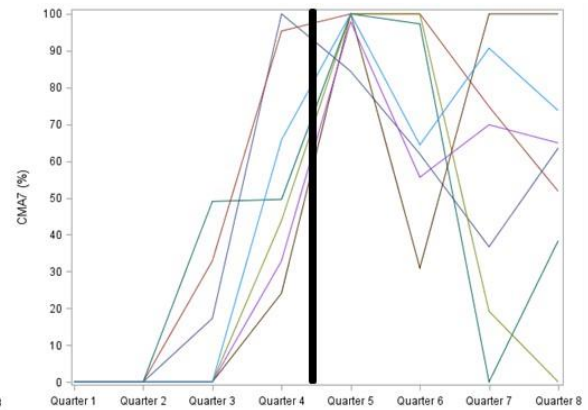

From increasing use to high use

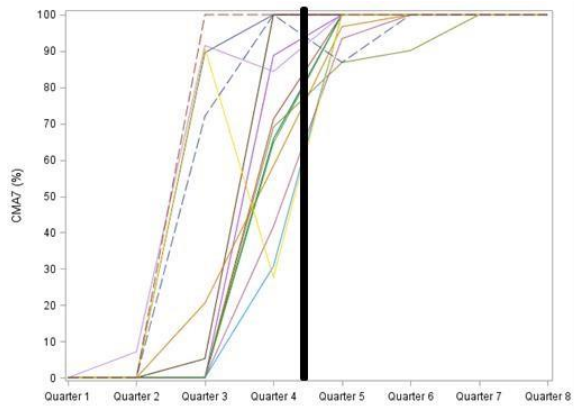

From increasing use to very high use

Group before hospitalisation: mild use

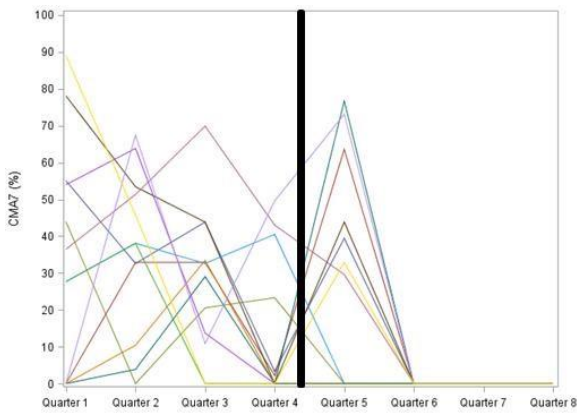

From mild use to mild use

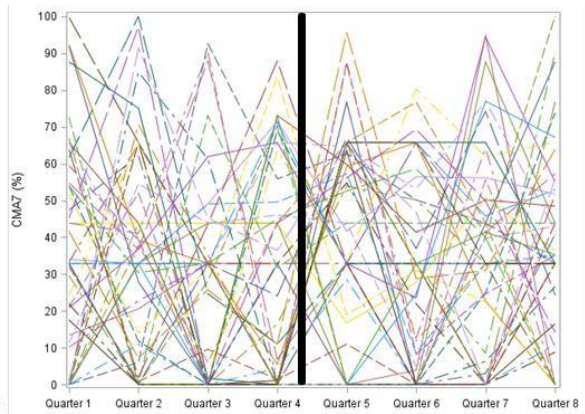

From mild use to moderate use

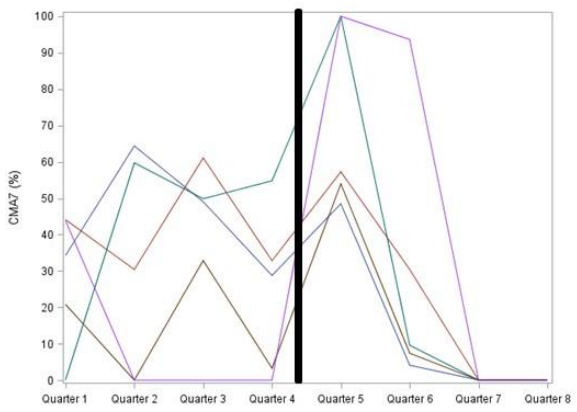

From mild use to decreasing use

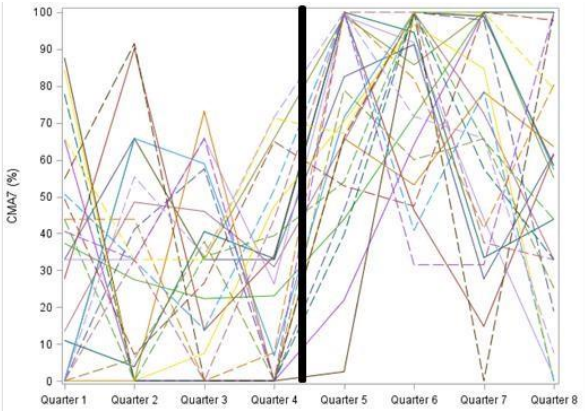

From mild use to high use

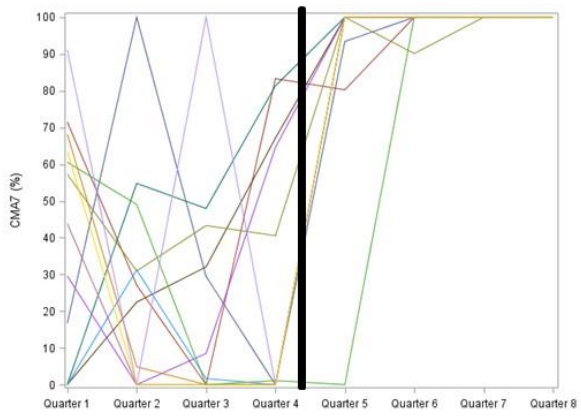

From mild use to very high use

Group before hospitalisation: high use

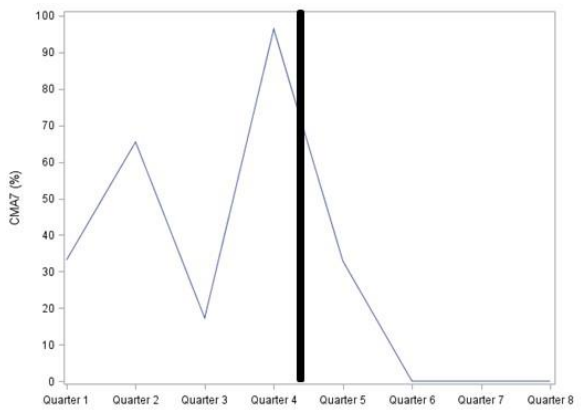

From high use to mild use

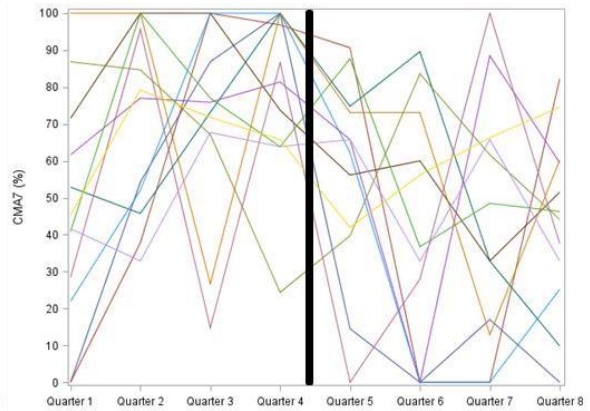

From high use to moderate use

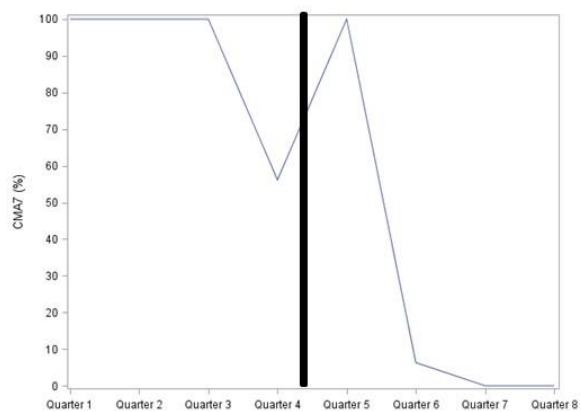

From high use to decreasing use

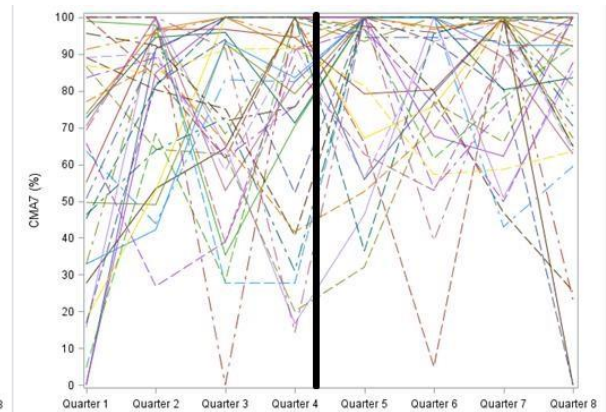

From high use to high use

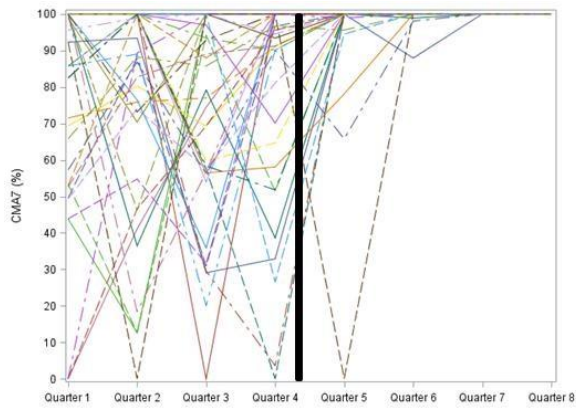

From high use to very high use

Group before hospitalisation: very high use

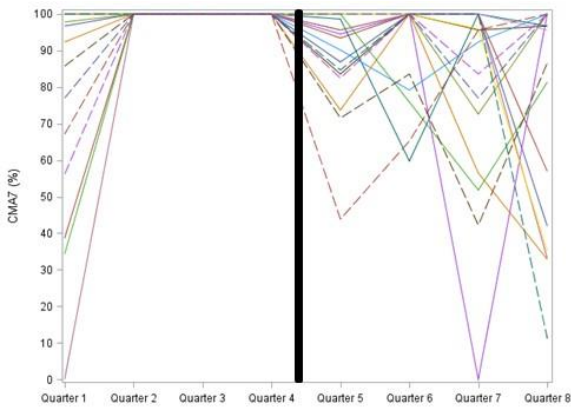

From very high use to high use

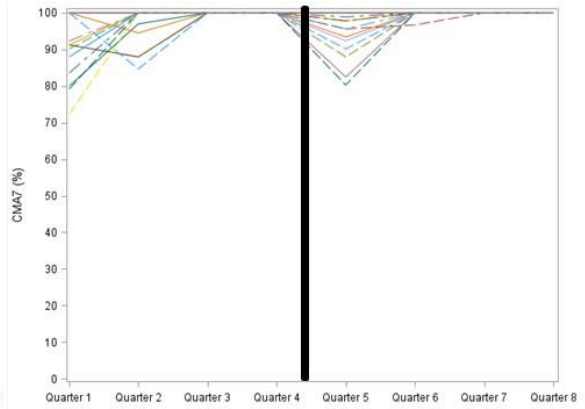

From very high use to very high use

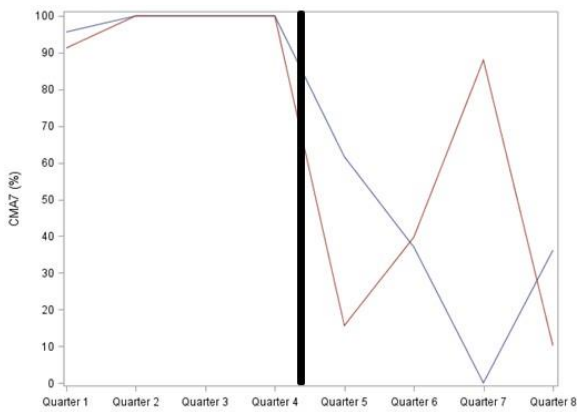

From very high use to moderate use

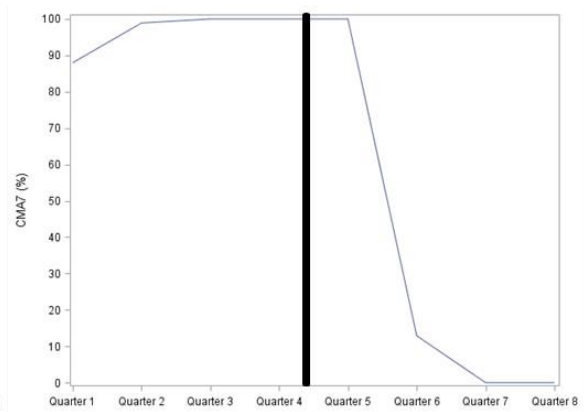

From very high use to decreasing use

No patient switched from very high use to mild use, so there are only 4 graphs in this group.

*Note: In these graphs, one line represents one patient*
